# Supplementary material for: Exercise-induced FNDC5/irisin protects nucleus pulposus cells against senescence and apoptosis by activating autophagy
Source: PubMed Central journal article supplement (PMC9355987; doi:10.1038/s12276-022-00811-2), 2022-07-26
Supplement: 12276_2022_811_MOESM1_ESM.pdf [file 12276_2022_811_MOESM1_ESM.pdf]

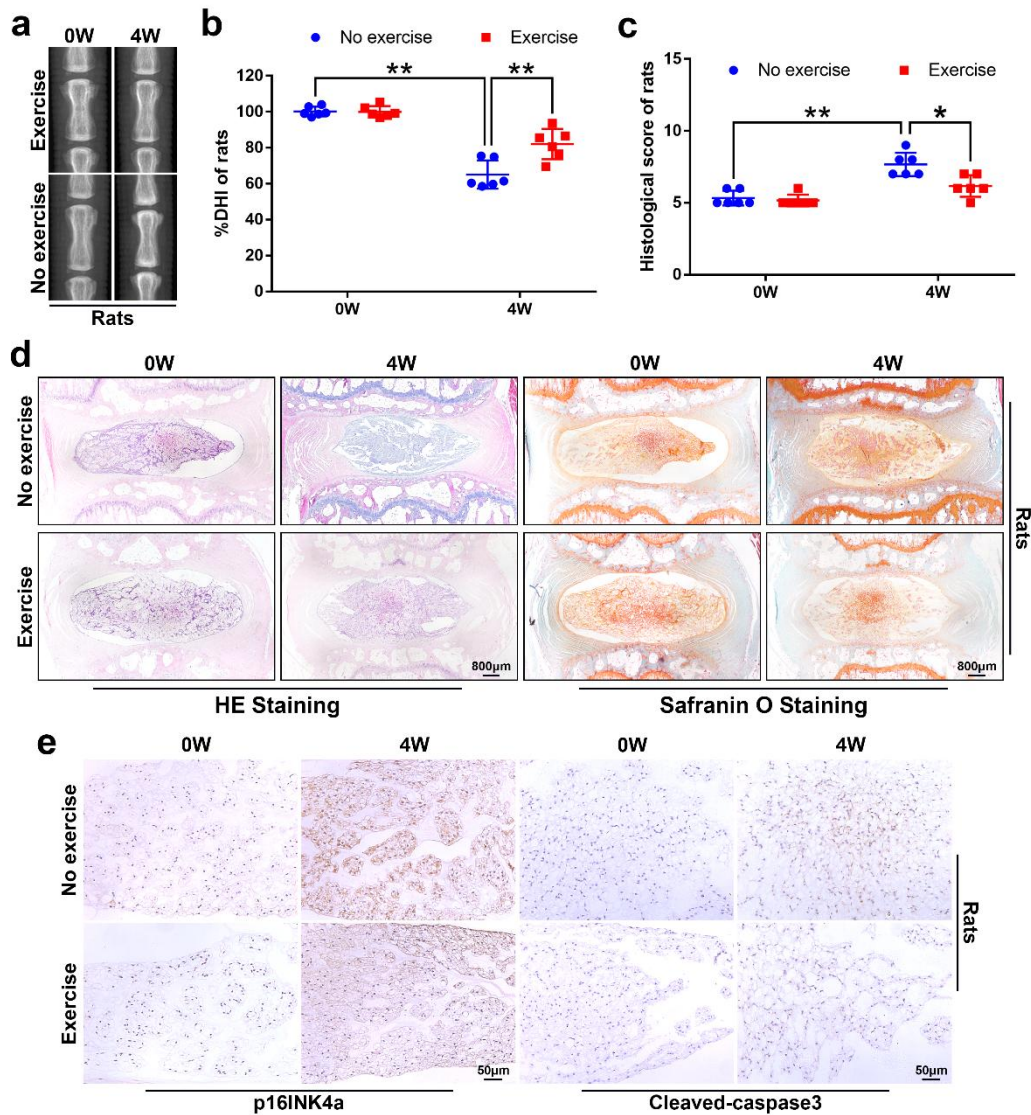

**Supplementary Fig.1 a.** Representative images of X-ray of rat-tail intervertebral space at 0 and 4 weeks. **b.** The disc height index of a mice-tail disc at 0 and 4 weeks (N=6). **c.** The histological grades evaluated at 0 and 4 weeks in rats. **d.** Representative HE staining and SO staining of discs in rats from two experimental groups at 0 and 4 weeks (bar: 800µm). **e.** The respective immunohistochemical staining of p16INK4a and cleaved-caspase3 in NP tissues of rats (bar:50µm). All data were shown as mean ± SD. \* $p < 0.05$ , \*\* $p < 0.01$ .

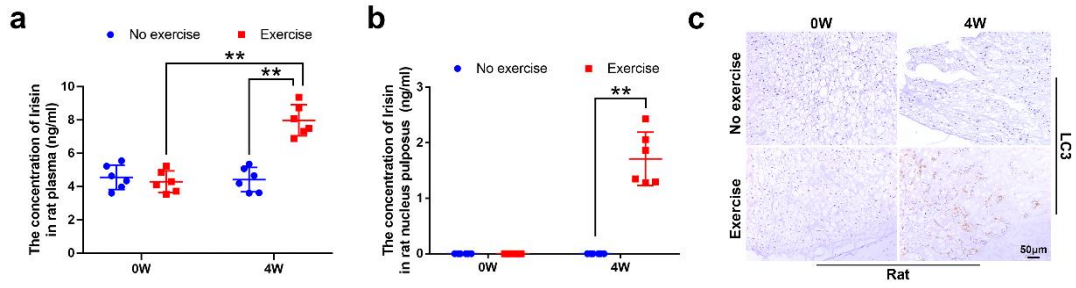

**Supplementary Fig.2 a.** Plasma content of irisin in the exercise group of rats compared to no-exercise group (N=6). **b.** NP tissue content of irisin in the exercise group of rats compared to no-exercise group (N=6). **c.** The respective immunohistochemical staining of LC3 in NP tissues of rats (bar:50µm). All data were shown as mean ± SD. \*p < 0.05, \*\*p < 0.01.

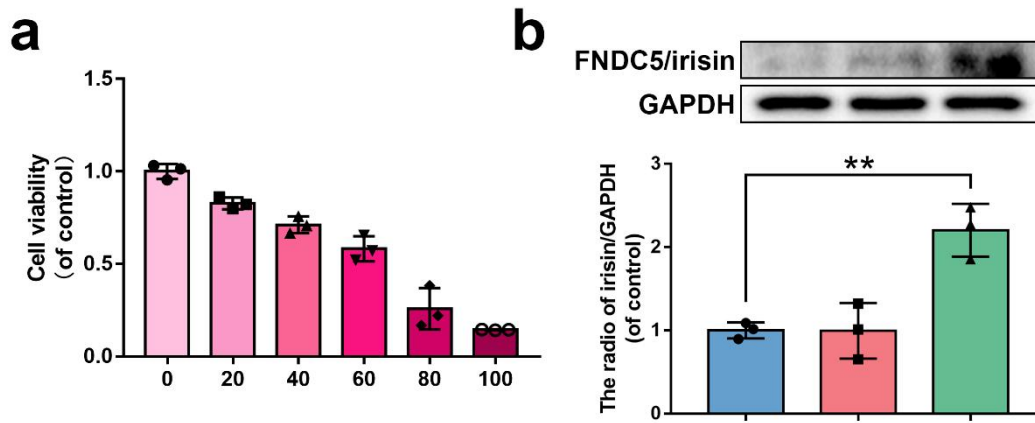

**Supplementary Fig.3 a.** The results of CCK-8 assay show the viability of NP cells treated with different concentrations of TBHP for 24h (N=3). **b.** The protein expression of FNDC5/irisin was detected by western blot in rat NP cells by transfecting with lentivirus (N=3). All data were shown as mean ± SD. \*p < 0.05, \*\*p < 0.01.

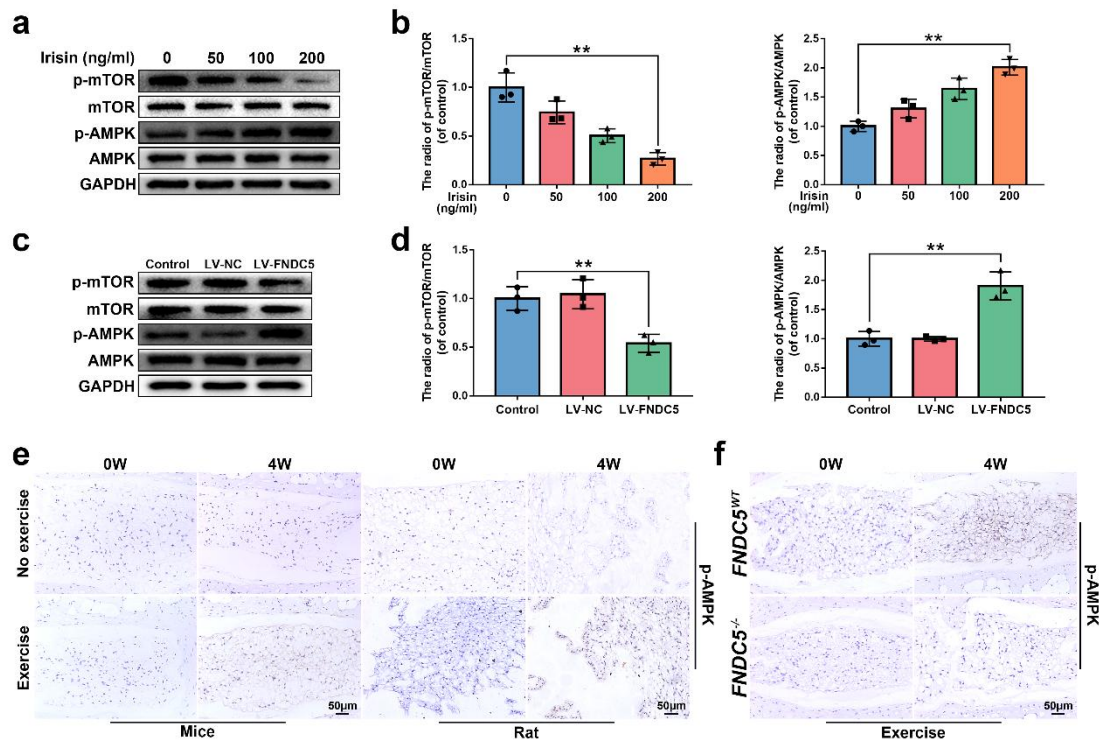

**Supplementary Fig.4 a, b.** The protein expression of p-mTOR, mTOR, p-AMPK and AMPK was detected by western blot in rat NP cells treated with 0, 50, 100, and 200ng/ml irisin for 24h (N=3). **c, d.** The protein expression of p-mTOR, mTOR, p-AMPK and AMPK was detected by western blot in rat NP cells transfected with LV-NC or LV-FNDC5 (N=3). **e.** The respective immunohistochemical staining of p-AMPK in NP tissues of mice and rats (bar:50μm). **f.** The respective immunohistochemical staining of p-AMPK in NP tissues of FNDC5<sup>WT</sup> /FNDC5<sup>-/-</sup> mice (bar:50μm). All data were shown as mean ± SD. \*p < 0.05, \*\*p < 0.01.

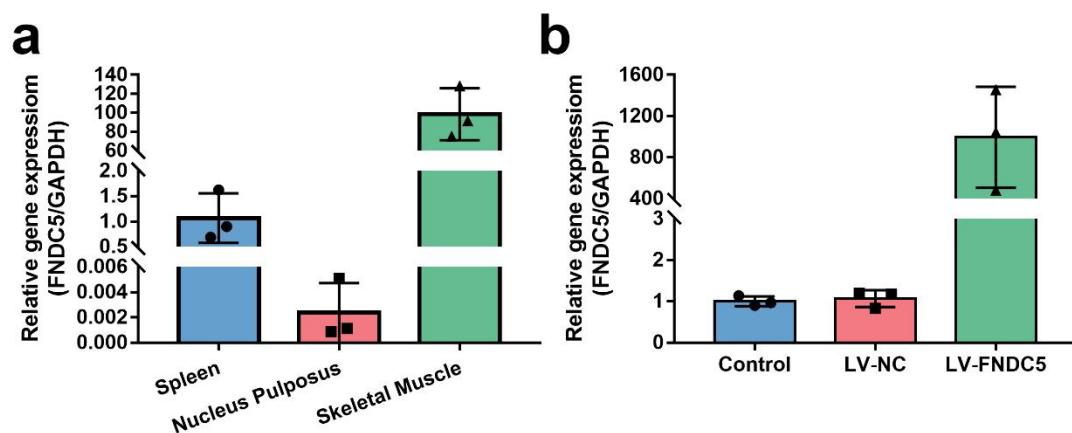

**Supplementary Fig.5 a.** The gene expression of FNDC5 in rat spleen, NP, and skeletal muscle

(N=3). **b.** The gene expression of FNDC5 in rat NP tissue at 14days after lentivirus injection (N=3). All data were shown as mean  $\pm$  SD. \* $p < 0.05$ , \*\* $p < 0.01$ .

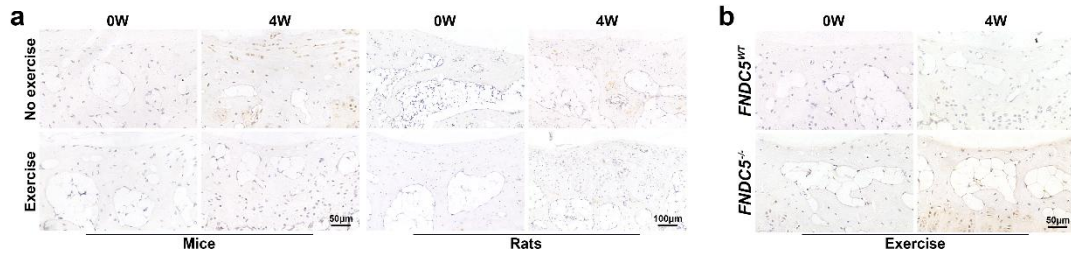

**Supplementary Fig.6 a.** The respective immunohistochemical staining of cleaved-caspase3 in VSB tissues of mice and rats (the bar of mice: 50µm; the bar of rats: 100µm). **b.** The respective immunohistochemical staining of cleaved-caspase3 in VSB tissues of FNDC5<sup>WT</sup>/FNDC5<sup>-/-</sup> mice (bar:50µm).

## Supplementary Table 1

### Primers used for mRNA expression studies using PCR

| Gene  | Forward primer (5'->3') | Reverse primer (5'->3') | Origin |
|-------|-------------------------|-------------------------|--------|
| FNDC5 | GATCATCGTCGTTGGTCCTCTT  | TGTTATTGGGCTCGTTGTCCT   | Rat    |
| GAPDH | GGCTCTCTGCTCCTCCC       | CCGTTCACACCGACCTT       | Rat    |

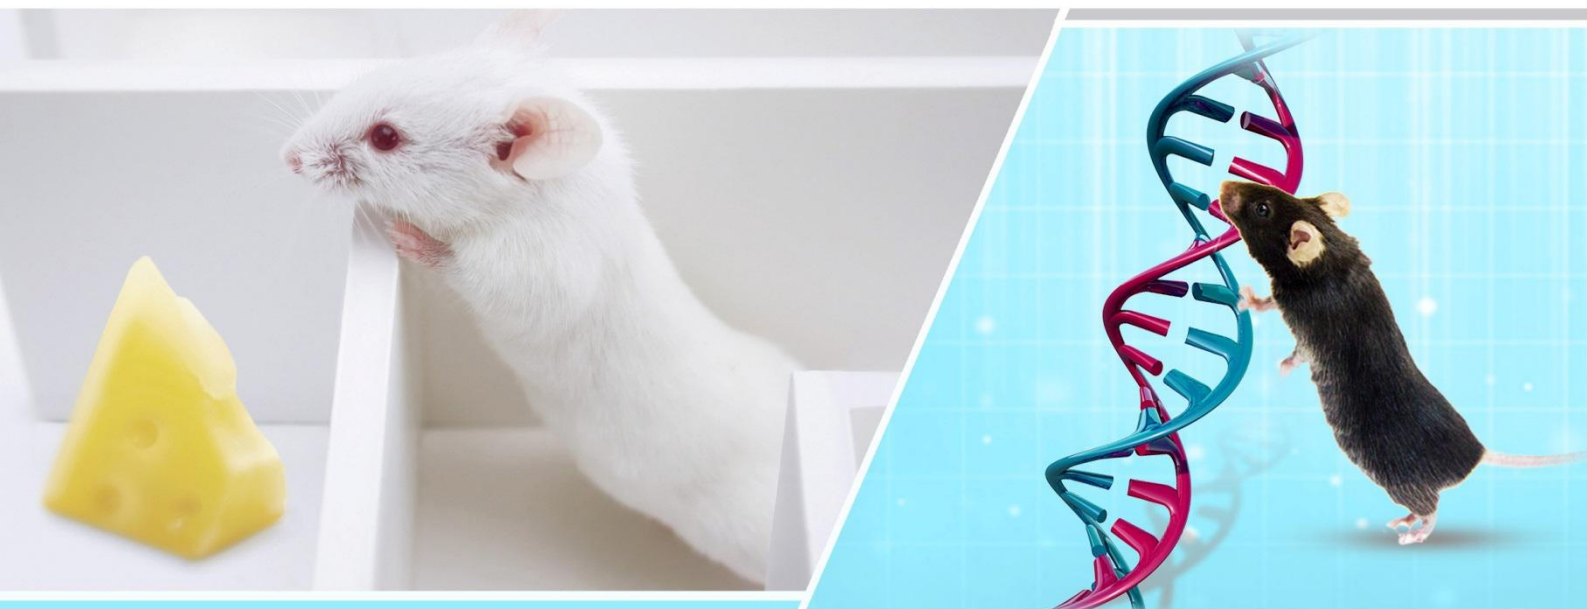

# Genotyping Strategy

Contract No: KOAIP200429YZ1-B

- Confidential -

## 1. Product Information

|               |                                     |
|---------------|-------------------------------------|
| Name          | C57BL/6N-Fndc5 <sup>em1cyagen</sup> |
| Serial Number | KOCMP-384061-Fndc5-B6N              |
| Gene          | Fndc5                               |
| NCBI ID       | 384061                              |
| Strain        | C57BL/6N                            |
| Type          | conventional knockout               |

## 2. Targeting Strategy

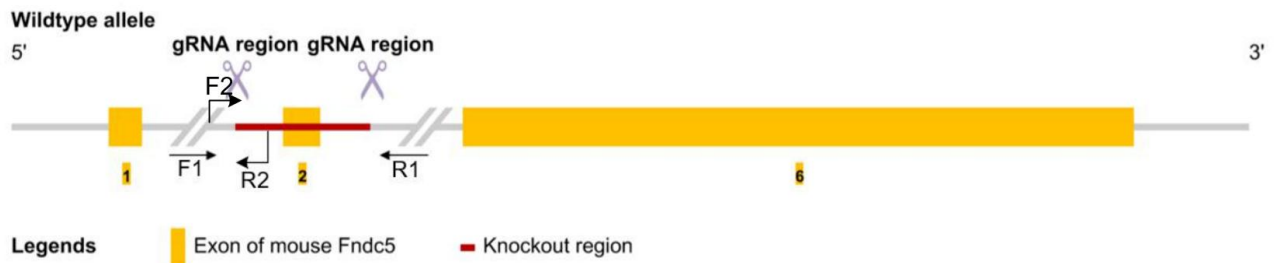

### 3. Genotyping strategy

Primers1: (Annealing Temperature 60.0 °C)

F1: 5'-CTGTCTCCAATGTTCCACTTGTCTG-3'

R1: 5'-CTTGCCTTTGTTCTTTGAGGCCATC-3'

Product size: 815 bp                  Wildtype allele: 1798 bp

Primers2: (Annealing Temperature 60.0 °C)

F2: 5'-CACTTGTCTGCTCTCTGGTTCTGT-3'

R2: 5'-GCTTGAACCAAGGCGAGAGCTAGT-3'

Product size: 678 bp

Homozygous: one band with 815 bp

Heterozygous: three bands with 815 bp, 678 bp and 1798 bp

Wildtype allele: two bands with 678 bp and 1798 bp

**Note:** If DNA sample is not very pure or without enough PCR extension time, the 1798 bp PCR product may not be amplified.

### 4. Expected Results

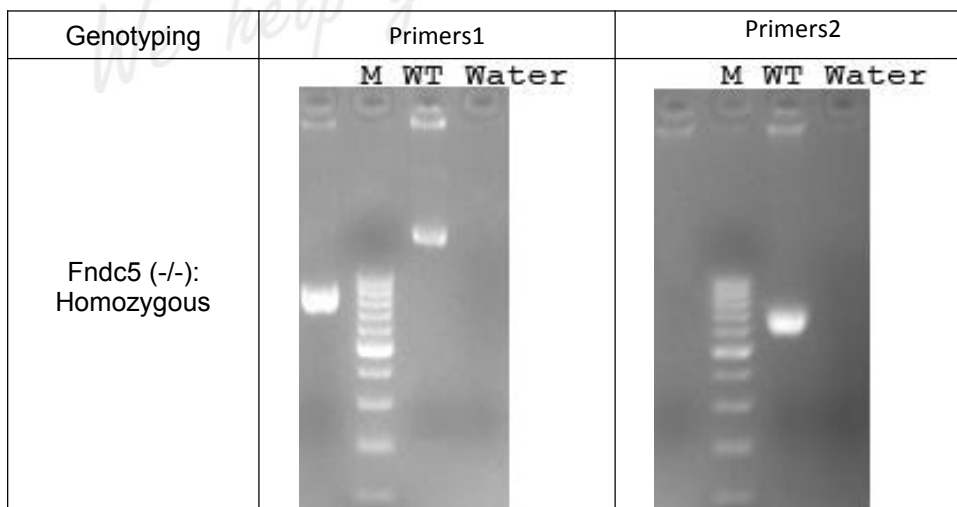



**Note:**

- 1) PCR was carried out in 25  $\mu$ L volume for 35 cycles under standard conditions, with all two primers listed above added to each reaction.
- 2) DNA marker: Thermo Scientific GeneRuler 100 bp DNA Ladder #SM0242

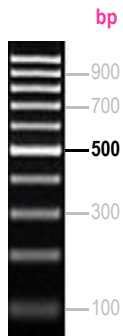

- 3) Controls used in PCR genotyping are:
  - Water control: No DNA template added.
  - Wildtype control: Mouse genomic DNA.

## 5. PCR reaction

### 5.1 DNA Extraction

➤ Method One:

We recommend that using TaKaRa MiniBEST Universal Genomic DNA Extraction kit (Ver.5.0\_Code No. 9765) to gain high purity of genomic DNA.

- a. Add 180  $\mu$ L of Buffer GL, 20  $\mu$ L of Proteinase K and 10  $\mu$ L of RNase A per tail piece (2-5 mm) in a microcentrifuge tube. Be careful not to cut too much tail.
- b. Incubate the tube at 56°C overnight.
- c. Spin in microcentrifuge at 12,000 rpm for 2 minutes to remove impurities.
- d. Add 200  $\mu$ L Buffer GB and 200  $\mu$ L absolute ethyl alcohol with sufficient mixing.
- e. Place the spin Column in a collection tube. Apply the sample to the spin and centrifuge at 12,000 rpm for 2 min. Discard flow-through.
- f. Add 500  $\mu$ L Buffer WA to the spin column and centrifuge at 12,000 rpm for 1 min. Discard flow-through.
- g. Add 700  $\mu$ L Buffer WB to the spin column and centrifuge at 12,000 rpm for 1 min. Discard flow-through. (Note: Make sure the Buffer WB has been premixed with 100% ethanol. When adding Buffer WB, add to the tube wall to wash off the residual salt.)
- h. Repeat step g.
- i. Place the spin Column in a collection tube and centrifuge at 12,000 rpm for 2 min.
- j. Place the spin Column in a new 1.5ml tube. Add 50~200  $\mu$ L sterilized water or elution buffer to the center of the column membrane and let the column stand 5min. (Note: Heating sterilized water or elution buffer up to 65°C can increase the yield of elution.)
- k. To elute DNA, centrifuge the column at 12,000 rpm for 2 min. To increase the yield of DNA, add the flow-through and/or 50~200  $\mu$ L sterilized water or elution buffer to the center of the spin column membrane and let the column stand 5 min. Centrifuge at 12,000 rpm for 2 min.
- l. Quantify to genomic DNA. Eluted genomic DNA can be quantified by electrophoresis or electrophoresis.

➤ Method Two:

A low-cost and sample method to gain rough genomic DNA.

- a. Add 100  $\mu$ L of tail digestion buffer per tail piece (2-5 mm) in a microcentrifuge tube. Be careful not to cut too much tail.
- b. Incubate the tube at 56°C overnight.
- c. Incubate the tube at 98°C for 13 minutes to denature the Proteinase K.
- d. Spin in microcentrifuge at top speed for 15 minutes. Use an aliquot of supernatant straight from the tube (1  $\mu$ L in a 12.5  $\mu$ L reaction) for PCR.

Final concentration of tail digestion buffer:

- 50 mM KCl
- 10 mM Tris-HCl (pH 9.0)
- 0.1 % Triton X-100
- 0.4 mg/mL Proteinase K

### 5.2 PCR Mixture (primer concentration: 10 $\mu$ M):

| Component          | x1           |
|--------------------|--------------|
| ddH <sub>2</sub> O | 9.0 $\mu$ l  |
| Product primer F   | 1.0 $\mu$ l  |
| Product primer R   | 1.0 $\mu$ l  |
| Premix Taq         | 12.5 $\mu$ l |
| DNA                | 1.5 $\mu$ l  |
| Total              | 25 $\mu$ l   |

### 5.3 PCR Reaction Conditions:

| Step                 | Temp. | Time  | Cycles |
|----------------------|-------|-------|--------|
| Initial denaturation | 94 °C | 3 min | 35 x   |
| Denaturation         | 94 °C | 30 s  |        |
| Annealing            | 60 °C | 35 s  |        |
| Extension            | 72 °C | 35 s  |        |
| Additional extension | 72 °C | 5 min |        |

### 5.4 Relevant Reagents:

|                                      |                                                       |
|--------------------------------------|-------------------------------------------------------|
| <b>Trizma Hydrochloride Solution</b> | Sigma, Cat. No. T2663                                 |
| <b>Proteinase K</b>                  | Merck, Cat. No. MK539480                              |
| <b>Triton X-100</b>                  | Sigma, T8787-50 mL                                    |
| <b>2 × Taq Master Mix (Dye Plus)</b> | Vazyme, P222                                          |
| <b>Agarose</b>                       | BIOWEST AGAROSE, REGULAR                              |
| <b>DNA Marker</b>                    | Thermo Scientific GeneRuler 100 bp DNA Ladder #SM0242 |
| <b>0.5×TBE</b>                       | Tris Bio Basic Inc, TBO194-500g                       |
|                                      | EDTA Shanghai Sangon, 0105-500g                       |
|                                      | Boric Acid, Shanghai Sangon, 0588-500g                |
